# Supplementary material for: CuxNiy alloy nanoparticles embedded in a nitrogen–carbon network for efficient conversion of carbon dioxide
Source: Royal Society of Chemistry journal article supplement (doi:10.1039/c9sc00174c), 2019-01-01
Supplement: c9sc00174c1.pdf [file c9sc00174c1.pdf]

Electronic Supplementary Material (ESI) for Chemical Science.

This journal is © The Royal Society of Chemistry 2018

## Electronic Supplementary Information

# **Cu<sub>x</sub>Ni<sub>y</sub> Alloy Nanoparticles Embedded in Nitrogen-Carbon Network for Efficient Conversion of Carbon Dioxide**

Dongxing Tan<sup>a</sup>, Jianling Zhang<sup>\*a</sup>, Xiuyan Cheng<sup>a</sup>, Xiuniang Tan<sup>a</sup>, Jinbiao Shi<sup>a</sup>, Bingxing Zhang<sup>a</sup>,  
Buxing Han<sup>a</sup>, Lirong Zheng<sup>b</sup>, and Jing Zhang<sup>b</sup>

<sup>a</sup>*Beijing National Laboratory for Molecular Sciences, CAS Key Laboratory of Colloid, Interface and Chemical Thermodynamics, Institute of Chemistry, Chinese Academy of Sciences, School of Chemical Sciences, University of Chinese Academy of Sciences, Beijing 100049, P.R.China.*

<sup>b</sup>*Beijing Synchrotron Radiation Facility (BSRF), Institute of High Energy Physics, Chinese Academy of Sciences, Beijing 100049, P.R.China.*

*\*Correspondence Email: zhangjl@iccas.ac.cn.*

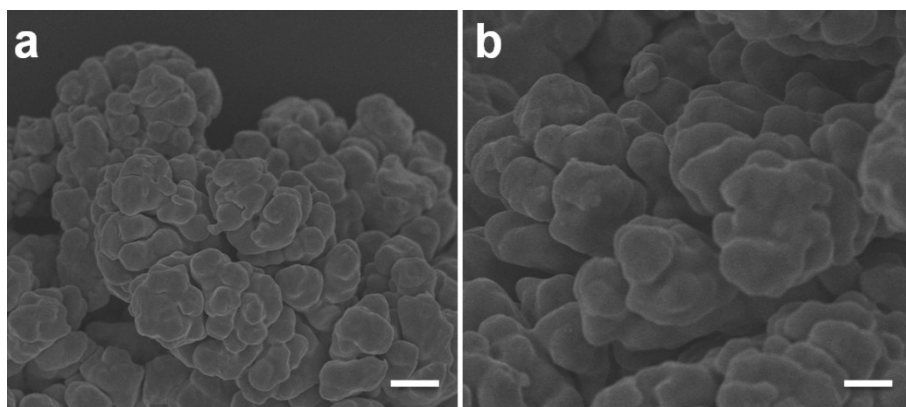

**Fig.S1** SEM images of Cu powder. Scale bars, 5  $\mu\text{m}$  in (a), 2  $\mu\text{m}$  in (b).

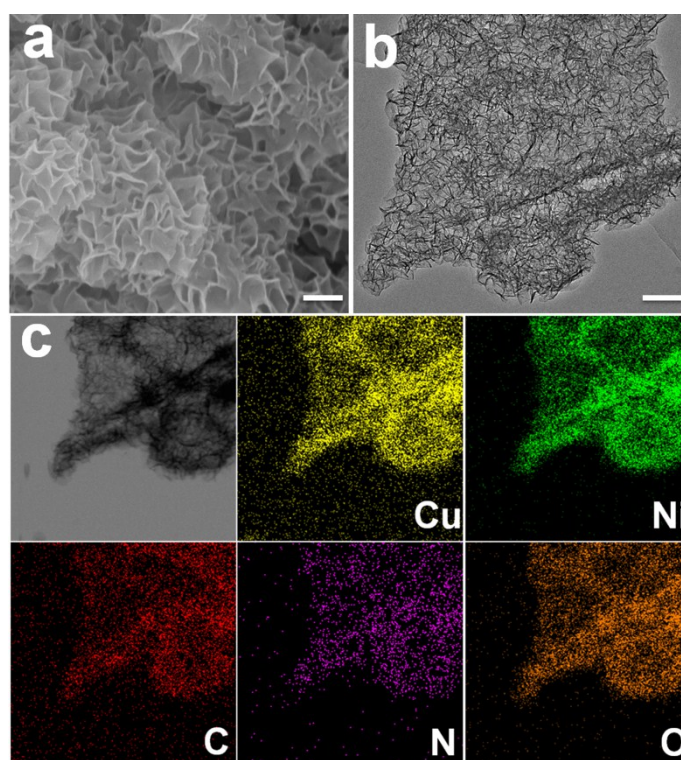

**Fig. S2** SEM (a) and TEM images (b) and EDX mapping (c) of Cu/Ni bimetallic complex. Scale bars, 300 nm in (a), 100 nm in (b). The complex consists of copper, nickel, carbon, nitrogen and oxygen elements, and the elements are evenly distributed throughout the sample.

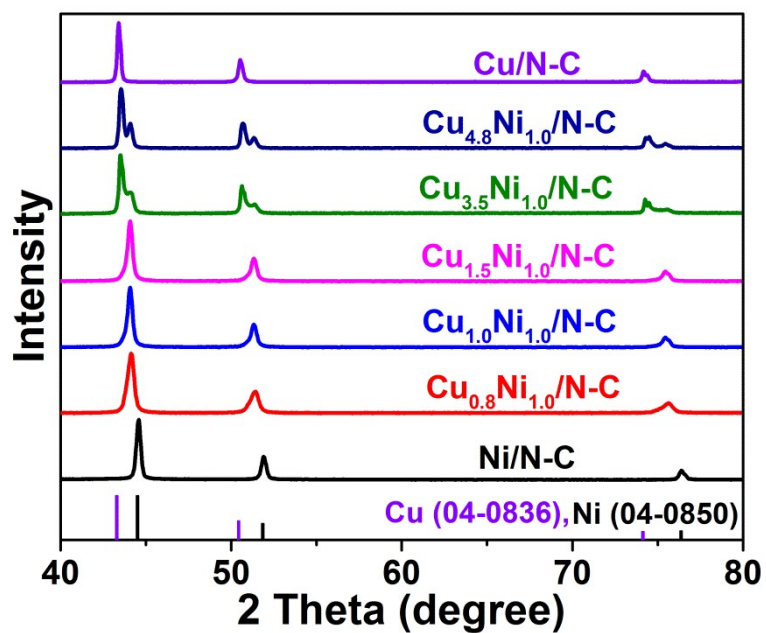

**Fig. S3** XRD patterns of the  $\text{Cu}_x\text{Ni}_y/\text{N-C}$ . The standard diffraction patterns for Cu (JCPDS no. 04-0836) and Ni (JCPDS no. 04-0850) are provided as references. For  $\text{Cu}_{0.8}\text{Ni}_{1.0}/\text{N-C}$ ,  $\text{Cu}_{1.0}\text{Ni}_{1.0}/\text{N-C}$  and  $\text{Cu}_{1.5}\text{Ni}_{1.0}/\text{N-C}$ , the  $\text{Cu}_x\text{Ni}_y$  nanoparticles exist as alloy, while for  $\text{Cu}_{3.5}\text{Ni}_{1.0}/\text{N-C}$  and  $\text{Cu}_{4.8}\text{Ni}_{1.0}/\text{N-C}$ , the  $\text{Cu}_x\text{Ni}_y$  nanoparticles present as a mixture of metallic copper and Cu/Ni bimetallic alloys.

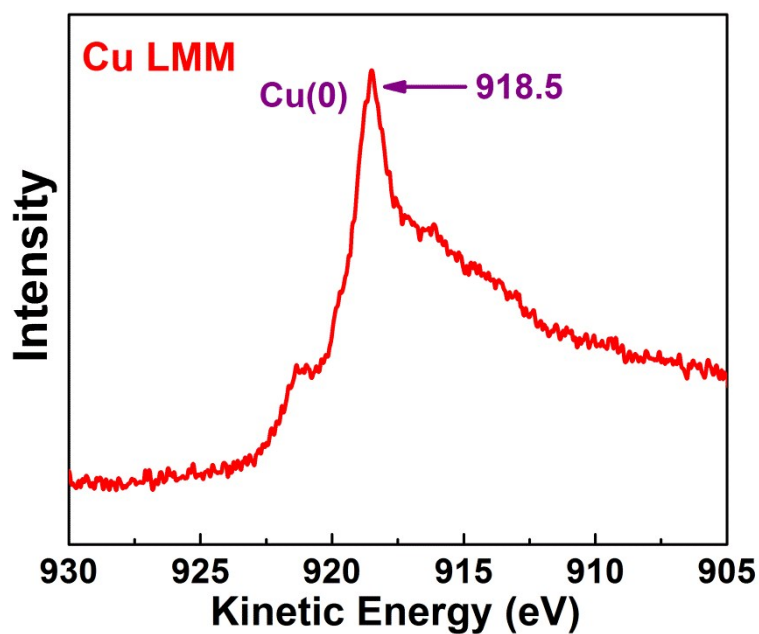

**Fig. S4** The Auger Cu LMM spectrum of  $\text{Cu}_{1.0}\text{Ni}_{1.0}/\text{N-C}$ .

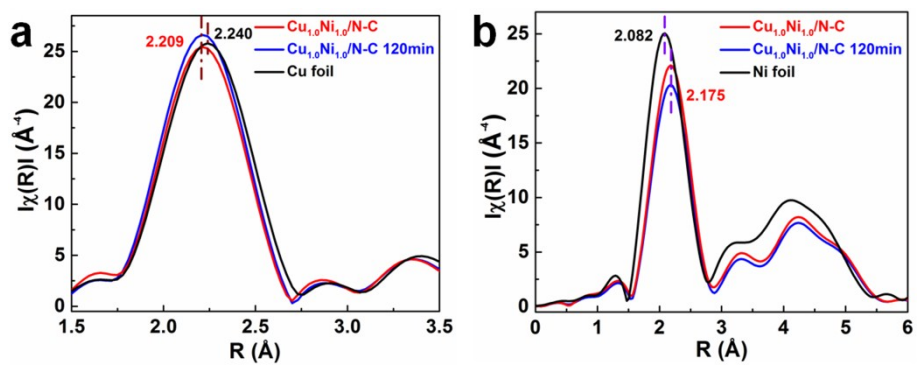

**Fig. S5**  $K^3$ -weighted ( $K$ ) function of the EXAFS spectra of  $\text{Cu}_{1.0}\text{Ni}_{1.0}/\text{N-C}$ ,  $\text{Cu}_{1.0}\text{Ni}_{1.0}/\text{N-C}$  after electrolysis for 120 min, Cu foil and Ni foil.

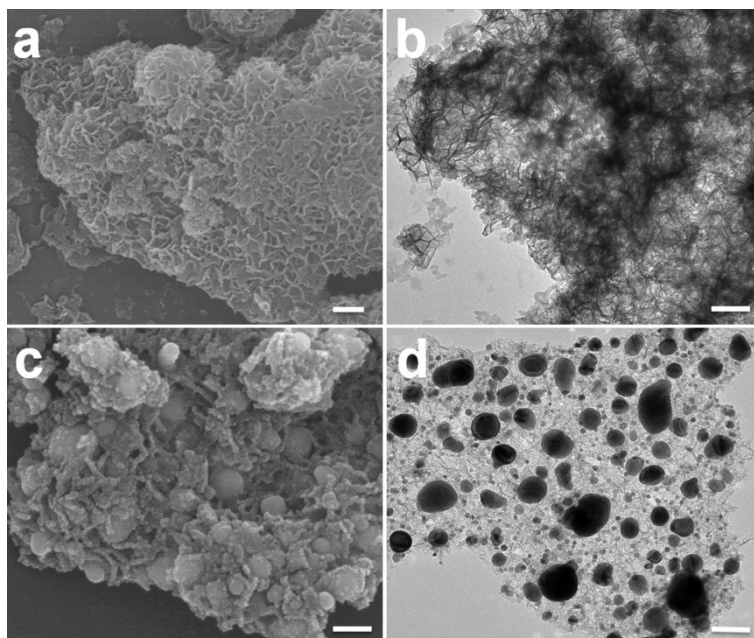

**Fig. S6** SEM (a, c) and TEM (b, d) images of  $\text{Cu}_{0.8}\text{Ni}_{1.0}/\text{N-C}$  complex (a, b) and  $\text{Cu}_{0.8}\text{Ni}_{1.0}/\text{N-C}$  catalyst (c, d). Scale bars, 200 nm in (a), 100 nm in (b), 100 nm in (c), 100 nm in (d).

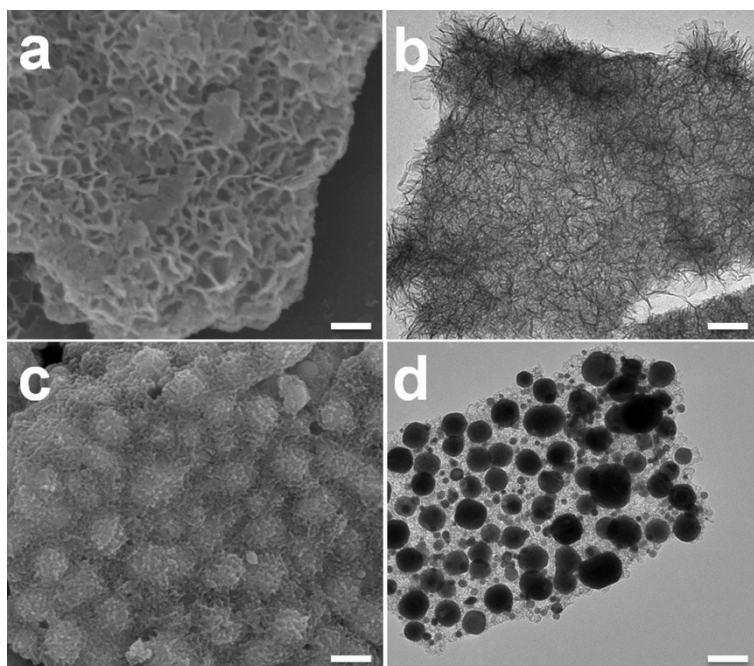

**Fig. S7** SEM (a, c) and TEM (b, d) images of Cu<sub>1.5</sub>Ni<sub>1.0</sub>/N-C complex (a, b) and Cu<sub>1.5</sub>Ni<sub>1.0</sub>/N-C catalyst (c, d). Scale bars, 100 nm in (a), 100 nm in (b), 100 nm in (c), 200 nm in (d).

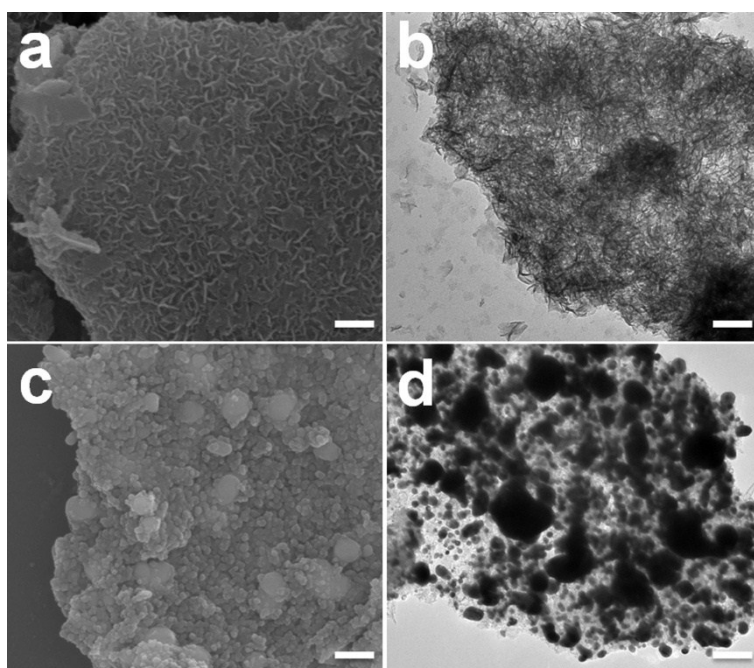

**Fig. S8** SEM (a, c) and TEM (b, d) images of Cu<sub>3.5</sub>Ni<sub>1.0</sub>/N-C complex (a, b) and Cu<sub>3.5</sub>Ni<sub>1.0</sub>/N-C catalyst (c, d). Scale bars, 200 nm in (a), 100 nm in (b), 100 nm in (c), 200 nm in (d).

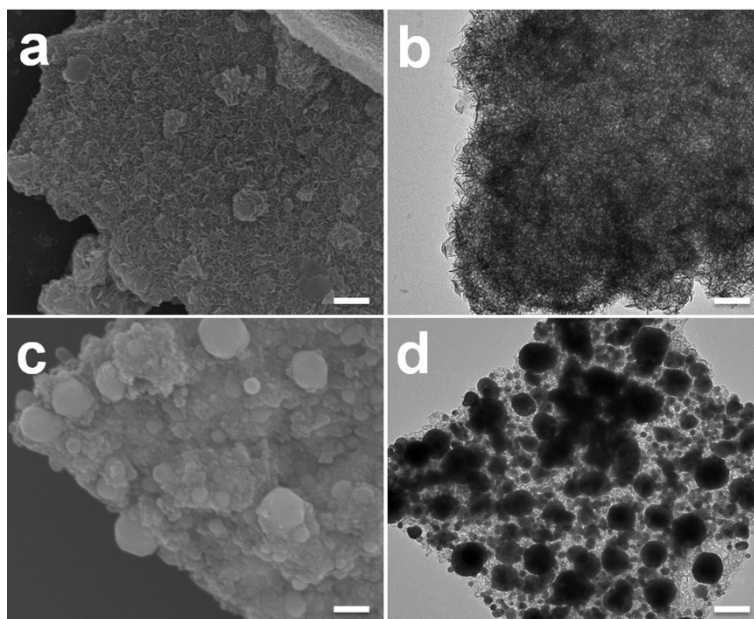

**Fig. S9** SEM (a, c) and TEM (b, d) images of Cu<sub>4.8</sub>Ni<sub>1.0</sub>/N-C complex (a, b) and Cu<sub>4.8</sub>Ni<sub>1.0</sub>/N-C catalyst (c, d). Scale bars, 200 nm in (a), 100 nm in (b), 100 nm in (c), 100 nm in (d).

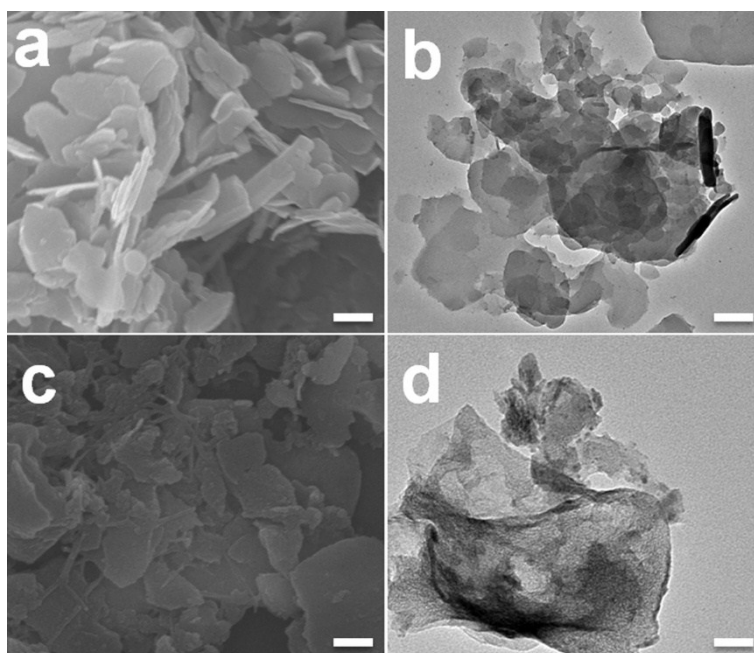

**Fig. S10** SEM (a, c) and TEM (b, d) images of Cu/N-C complex (a, b) and Cu/N-C catalyst (c, d). Scale bars, 200 nm in (a), 100 nm in (b), 200 nm in (c), 100 nm in (d).

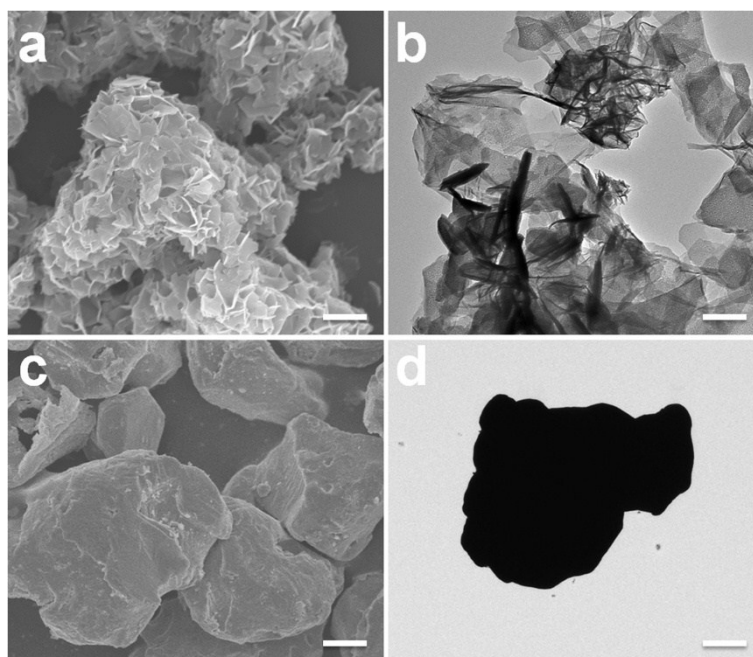

**Fig. S11** SEM (a, c) and TEM (b, d) images of Ni/N-C complex (a, b) and Ni/N-C catalyst (c, d). Scale bars, 100 nm in (a), 200 nm in (b), 500 nm in (c), 3 μm in (d).

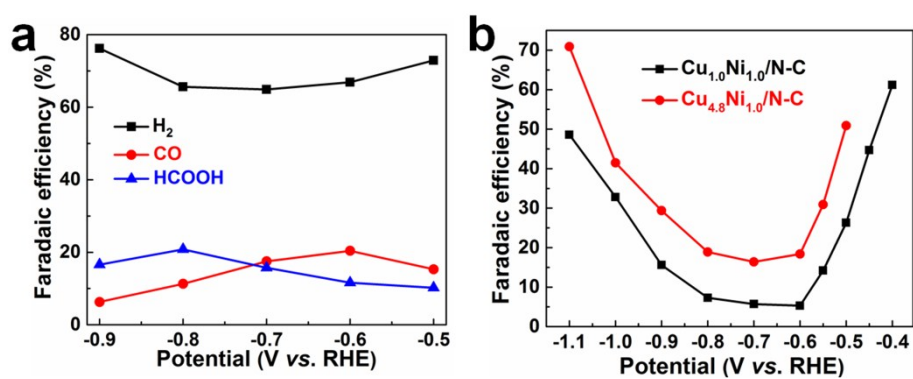

**Fig. S12** Faradaic efficiency of H<sub>2</sub>, CO and HCOOH at various potentials for Cu/N-C (a). Faradaic efficiency of H<sub>2</sub> at various potentials for Cu<sub>1.0</sub>Ni<sub>1.0</sub>/N-C and Cu<sub>4.8</sub>Ni<sub>1.0</sub>/N-C (b).

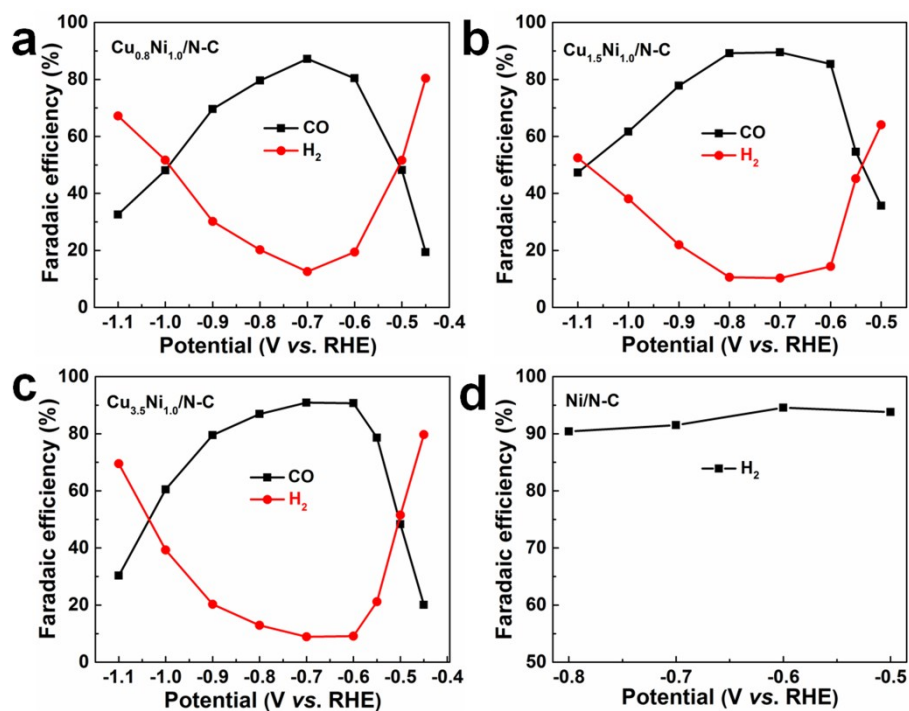

**Fig. S13** Faradaic efficiency of H<sub>2</sub> and CO at various potentials for Cu<sub>0.8</sub>Ni<sub>1.0</sub>/N-C (a), Cu<sub>1.5</sub>Ni<sub>1.0</sub>/N-C (b) and Cu<sub>3.5</sub>Ni<sub>1.0</sub>/N-C (c). Faradaic efficiency of H<sub>2</sub> at various potentials for Ni/N-C (d).

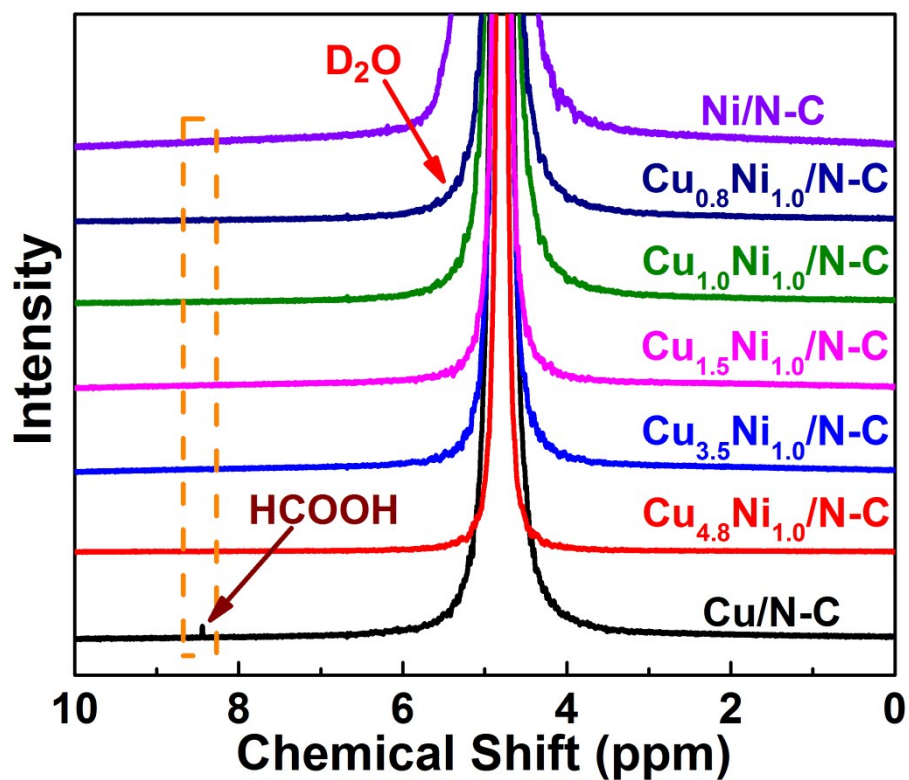

**Fig. S14** <sup>1</sup>H NMR spectra of the electrolytes after CO<sub>2</sub> reduction at different potentials versus RHE.



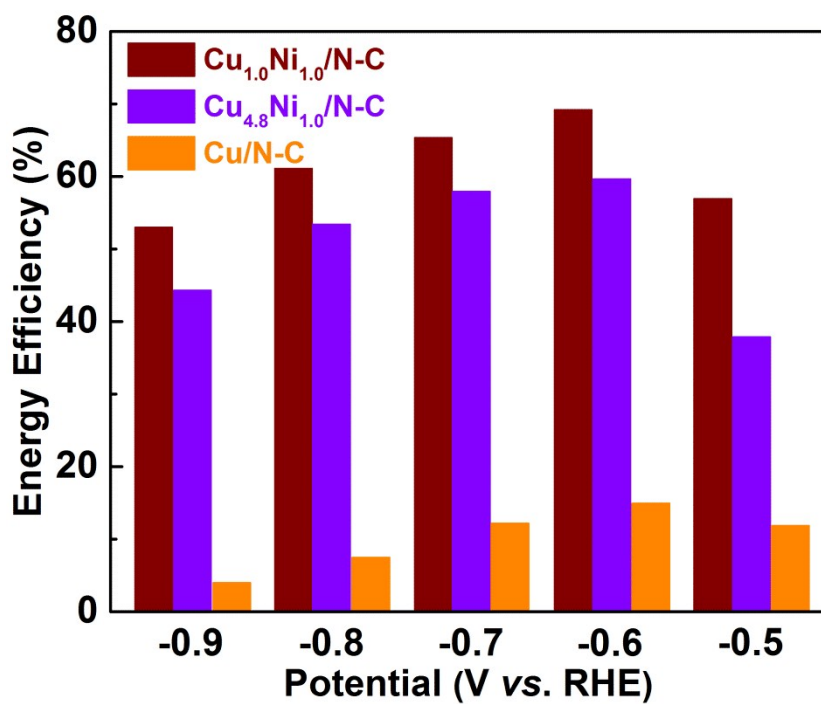

Fig. S15 Energy efficiency of CO formation over different catalysts at different applied potentials.

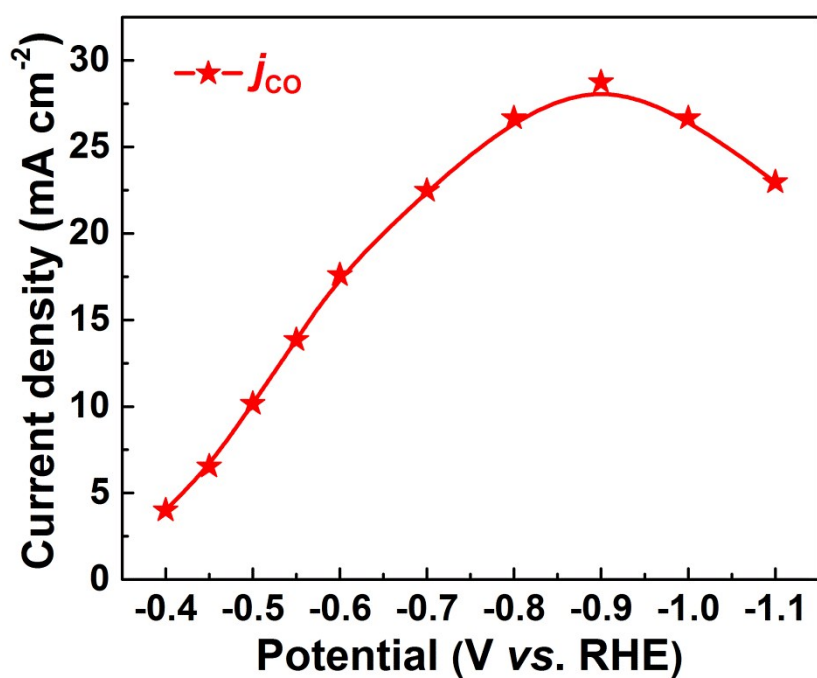

Fig. S16 Partial current density of Cu<sub>1.0</sub>Ni<sub>1.0</sub>/N-C at the applied potentials.

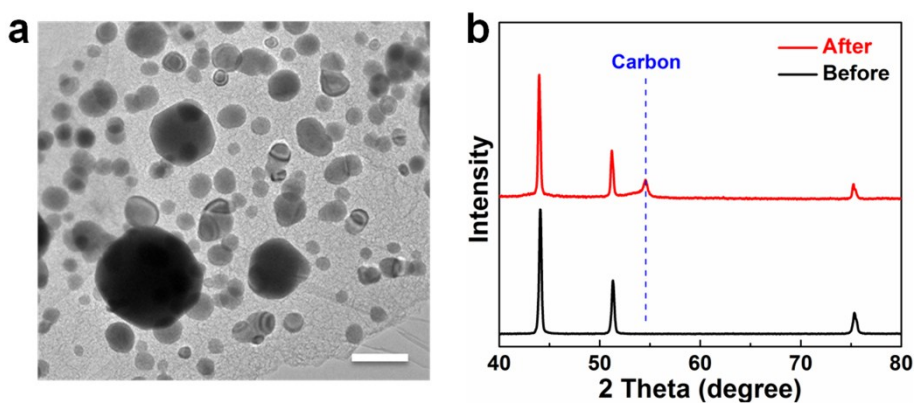

**Fig. S17** TEM image (a) and XRD patterns (b) of  $\text{Cu}_{1.0}\text{Ni}_{1.0}/\text{N-C}$  after  $\text{CO}_2$  reduction at  $-0.61$  V for 38 h. Scale bars: 100 nm in (a).

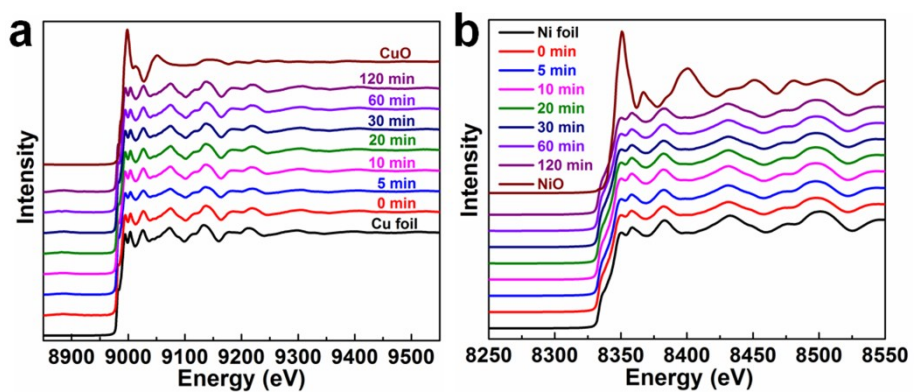

**Fig. S18** Cu (a) and Ni (b) K-edge XANES spectra of  $\text{Cu}_{1.0}\text{Ni}_{1.0}/\text{N-C}$  and  $\text{Cu}_{1.0}\text{Ni}_{1.0}/\text{N-C}$  after different electrolytic time. Cu foil, CuO, Ni foil and NiO were used as contrast samples.

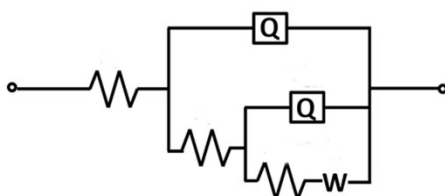

**Fig. S19** The electrical equivalent circuit used for simulating the experimental impedance data.

**Table S1.** Element contents in Cu<sub>x</sub>Ni<sub>y</sub>/N-C electrocatalysts as well as the molar ratios of Cu to Ni.

| electrocatalysts                         | Cu (wt%) | Ni (wt%) | C (wt%) | N (wt%) | O (wt%) | Molar ratio of Cu : Ni |
|------------------------------------------|----------|----------|---------|---------|---------|------------------------|
| Cu/N-C                                   | 80.1     | /        | 13.4    | 5.0     | 1.5     | /                      |
| Cu <sub>0.8</sub> Ni <sub>1.0</sub> /N-C | 31.9     | 36.4     | 25.0    | 4.6     | 2.1     | 0.8:1.0                |
| Cu <sub>1.0</sub> Ni <sub>1.0</sub> /N-C | 37.8     | 33.5     | 23.2    | 4.2     | 1.3     | 1.0:1.0                |
| Cu <sub>1.5</sub> Ni <sub>1.0</sub> /N-C | 43.1     | 27.9     | 25.0    | 3.1     | 0.9     | 1.5:1.0                |
| Cu <sub>3.5</sub> Ni <sub>1.0</sub> /N-C | 60.3     | 16.1     | 17.2    | 5.1     | 1.3     | 3.5:1.0                |
| Cu <sub>4.9</sub> Ni <sub>1.0</sub> /N-C | 64.9     | 12.4     | 18.5    | 2.3     | 1.9     | 4.8:1.0                |
| Ni/N-C                                   | /        | 94.1     | 3.5     | 1.1     | 1.3     | /                      |

**Table S2.** The catalytic performances of Cu-based alloys and bimetallic catalysts.

| Catalyst                                   | Electrolyte              | Product                                                                                   | FE(CO) | Potential | Current density | Ref.      |
|--------------------------------------------|--------------------------|-------------------------------------------------------------------------------------------|--------|-----------|-----------------|-----------|
| Pd <sub>85</sub> Cu <sub>15</sub> /C       | 0.1 M KHCO <sub>3</sub>  | CO                                                                                        | 86%    | -0.89     | 6.9             | 1         |
| C-Cu/SnO <sub>2</sub> -0.8                 | 0.5 M KHCO <sub>3</sub>  | CO, HCOOH                                                                                 | 93%    | -0.70     | 4.6             | 2         |
| CuInO <sub>2</sub>                         | 0.1 M KHCO <sub>3</sub>  | CO, HCOOH                                                                                 | 20%    | -0.60     | 2.3             | 3         |
| Cu-In alloy                                | 0.1 M KHCO <sub>3</sub>  | CO, HCOOH                                                                                 | 70%    | -0.80     | /               | 4         |
| Cu-Sn                                      | 0.1 M KHCO <sub>3</sub>  | CO, HCOOH                                                                                 | 90%    | -0.60     | 1.0             | 5         |
| $\alpha$ -AuCu NP                          | 0.1 M KHCO <sub>3</sub>  | CO, HCOOH                                                                                 | 80%    | -0.77     | 1.8             | 6         |
| Cu-Pd (ordered)                            | 1 M KOH                  | CO, CH <sub>4</sub> , C <sub>2</sub> H <sub>4</sub> ,<br>C <sub>2</sub> H <sub>5</sub> OH | 80%    | -0.55     | /               | 7         |
| Cu-In                                      | 0.1 M KHCO <sub>3</sub>  | CO, HCOOH                                                                                 | 85%    | -0.60     | 0.7             | 8         |
| FL-Pd <sub>3</sub> Cu                      | 0.1 M KHCO <sub>3</sub>  | CO                                                                                        | 82.1%  | -0.9      | 6.0             | 9         |
| Cu/Ni(OH) <sub>2</sub>                     | 0.5 M NaHCO <sub>3</sub> | CO                                                                                        | 92%    | -0.5      | 4.3             | 10        |
| Cu-Pd-0.3                                  | 0.5 M KHCO <sub>3</sub>  | CO                                                                                        | 93%    | -0.87     | 5.5             | 11        |
| CuIn <sub>20</sub>                         | 0.1 M KHCO <sub>3</sub>  | CO, HCOOH                                                                                 | 93%    | -0.60     | 2               | 12        |
| Mesoporous Pd <sub>7</sub> Cu <sub>3</sub> | 0.1 M KHCO <sub>3</sub>  | CO                                                                                        | 80%    | -0.80     | 2               | 13        |
| Cu <sub>16</sub> Ag <sub>84</sub> dendrite | 0.5 M KHCO <sub>3</sub>  | CO                                                                                        | 45%    | -0.87     | /               | 14        |
| Ag-Cu core-shell                           | 0.1 M KHCO <sub>3</sub>  | CO, CH <sub>4</sub> , C <sub>2</sub> H <sub>4</sub>                                       | 82%    | -1.06     | 1.8             | 15        |
| Au-coated Cu NW                            | 0.5 M KHCO <sub>3</sub>  | CO                                                                                        | 33%    | -0.65     | 13.5            | 16        |
| Cu <sub>87</sub> Sn <sub>13</sub>          | 0.1 M KHCO <sub>3</sub>  | CO, HCOOH,<br>CH <sub>4</sub> , C <sub>2</sub> H <sub>4</sub>                             | 60%    | -1.0      | /               | 17        |
| Cu <sub>1.0</sub> Ni <sub>1.0</sub> /N-C   | 0.5 M KHCO <sub>3</sub>  | CO                                                                                        | 94.5%  | -0.60     | 18.8            | This work |

## References

- 1 Z. Yin, D. Gao, S. Yao, B. Zhao, F. Cai, L. Lin, P. Tang, P. Zhai, G. Wang and D. Ma, *Nano Energy*, 2016, **27**, 35-43.
- 2 Q. Li, J. Fu, W. Zhu, Z. Chen, B. Shen, L. Wu, Z. Xi, T. Wang, G. Lu and J. J. Zhu, *J. Am. Chem. Soc.*, 2017, **139**, 4290-4293.
- 3 G. O. Larrazábal, A. J. Martín, S. Mitchell, R. Hauert and J. Pérezramírez, *ACS Catal.*, 2016, **6**, 6265-6274.
- 4 A. Jedidi, S. Rasul, D. Masih, L. Cavallo and K. Takanebe, *J. Mater. Chem. A*, 2015, **3**, 19085-19092.
- 5 S. Sarfraz, A. T. Garciaesparza, A. Jedidi, L. Cavallo and K. Takanebe, *ACS Catal.*, 2016, **6**, 2842-2851.
- 6 D. Kim, C. Xie, N. Becknell, Y. Yu, M. Karamad, K. Chan, E. J. Crumlin, J. K. Norskov and P. Yang, *J. Am. Chem. Soc.*, 2017, **139**, 8329-8336.
- 7 S. Ma, M. Sadakiyo, M. Heima, R. Luo, R. T. Haasch, J. I. Gold, M. Yamauchi and P. J. Kenis, *J. Am. Chem. Soc.*, 2016, **139**, 47-50.
- 8 S. Rasul, D. H. Anjum, A. Jedidi, Y. Minenkov, L. Cavallo and K. Takanebe, *Angew. Chem., Int. Ed.*, 2015, **54**, 2146-2150.
- 9 W. Zhu, L. Zhang, P. Yang, X. Chang, H. Dong, A. Li, C. Hu, Z. Huang, Z. J. Zhao and J. Gong, *Small*, 2017, **14**, 1703314.
- 10 L. Dai, Q. Qin, P. Wang, X. Zhao, C. Hu, P. Liu, R. Qin, M. Chen, D. Ou and C. Xu, *Sci. Adv.*, 2017, **3**, e1701069.
- 11 D. Chen, Q. Yao, P. Cui, H. Liu, J. Xie and J. Yang, *ACS Appl. Energy Mater.*, 2018, **1**, 883-890.
- 12 W. Luo, W. Xie, R. Mutschler, E. Oveisi, G. L. De Gregorio, R. Buonsanti and A. Züttel, *ACS Catal.*, 2018, **8**, 6571-6581.
- 13 M. Li, J. Wang, P. Li, K. Chang, C. Li, T. Wang, B. Jiang, H. Zhang, H. Liu and Y. Yamauchi, *J. Mater. Chem. A*, 2016, **4**, 4776-4782.
- 14 J. Choi, M. J. Kim, H. A. Sang, I. Choi, J. H. Jang, S. H. Yu, J. J. Kim and S. K. Kim, *Chem. Eng. J.*, 2016, **299**, 37-44.
- 15 Z. Chang, S. J. Huo, Z. Wei, J. Fang and H. Wang, *J. Phys. Chem. C*, 2017, **121**, 11368-11379.
- 16 K. Chen, X. Zhang, T. Williams, L. Bourgeois and D. R. Macfarlane, *Electrochim. Acta*, 2017, **239**, 84-89.
- 17 M. Morimoto, Y. Takatsuji, R. Yamasaki, H. Hashimoto, I. Nakata, T. Sakakura and T. Haruyama, *Electrocatalysis*, 2017, **9**, 1-10.
